# Supplementary material for: Preserving neuromuscular synapses in ALS by stimulating MuSK with a therapeutic agonist antibody
Source: eLife journal article supplement (doi:10.7554/elife.34375), 2018-02-19
Supplement: supp [file elife-34375-supp-v1.zip]

**Figure 4- Figure Supplement 1**

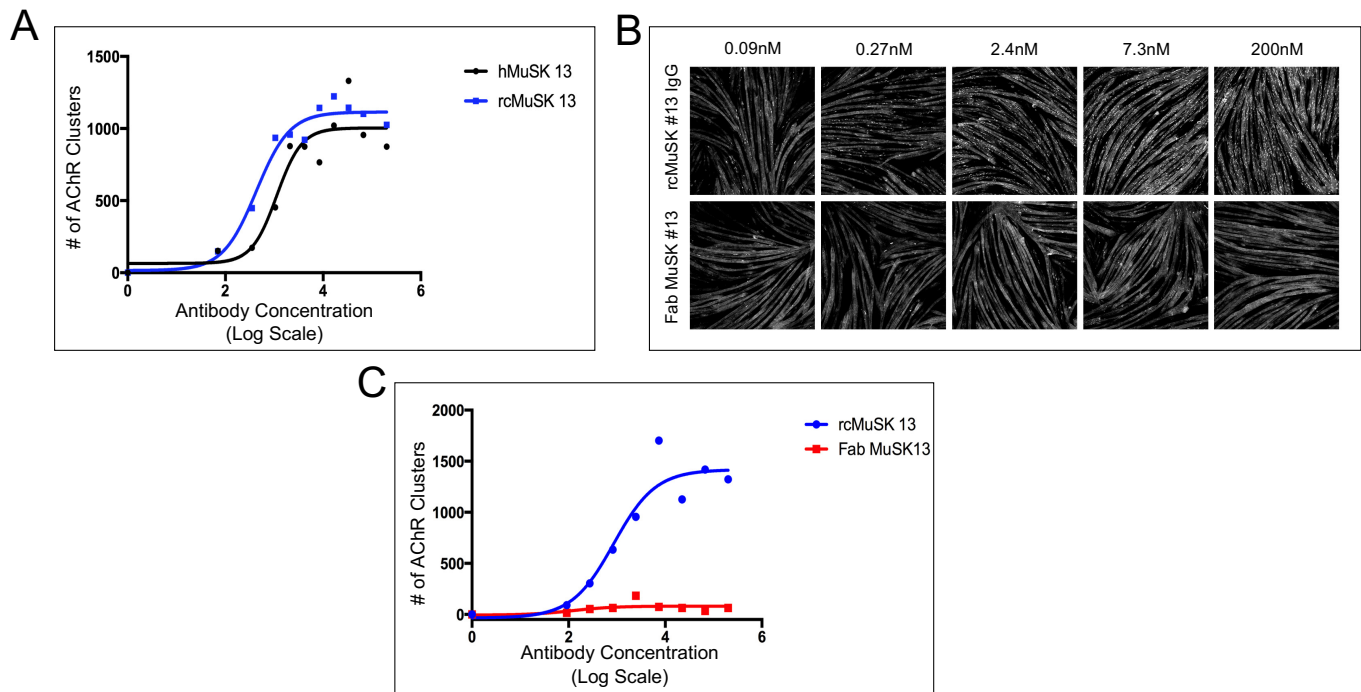

**The human and reverse chimera versions of MuSK agonist antibody #13 induce acetylcholine receptor (AChR) clustering in C2C12 myotubes whereas a Fab from MuSK antibody #13 fails to stimulate AChR clustering.** (A) Human (h) and reverse chimera (rc) MuSK #13 antibodies are similarly effective in stimulating AChR clustering in C2C12 myotubes (n=3). (B,C) C2C12 myotubes were treated with rc MuSK #13 or a Fab from MuSK #13 for 16 hr at the indicated concentrations and stained with  $\alpha$ -BGT. We found that the Fab fragment from antibody #13, unlike the intact IgG or the scFv, was unable to stimulate clustering of AChRs, indicating that antibodies must be dimeric and force-dimerize MuSK and promote an orientation that is favorable for trans-phosphorylation. (C) The rc antibody #13 stimulates AChR clustering in a dose-dependent and saturable manner, whereas Fab #13 fails to stimulate AChR clustering (n= 3).
