# Supplementary material for: Preserving neuromuscular synapses in ALS by stimulating MuSK with a therapeutic agonist antibody
Source: eLife journal article supplement (doi:10.7554/elife.34375), 2018-02-19
Supplement: supp [file elife-34375-supp-v1.zip]

**Figure 5- Figure Supplement 1**

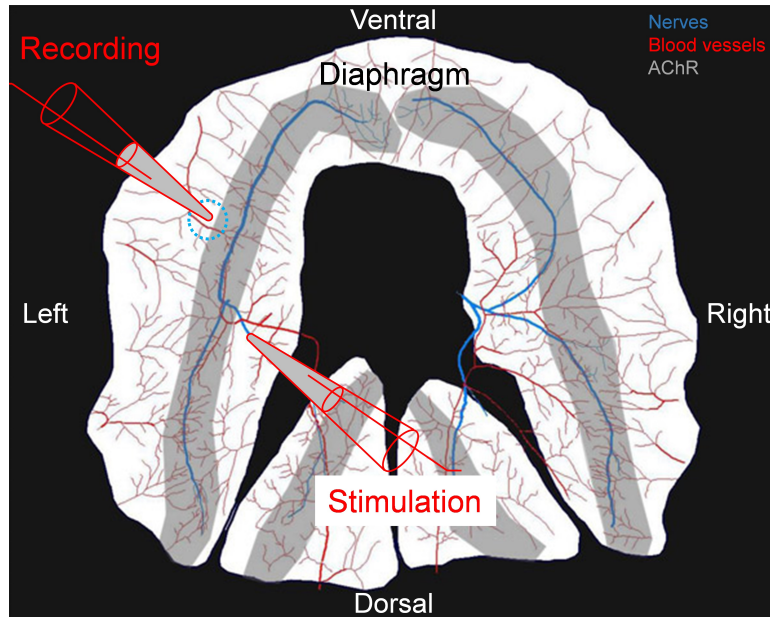

**Drawing of experimental protocol to stimulate the phrenic nerve and record CMAPs in the diaphragm.** The phrenic nerve was placed in a bipolar suction electrode for stimulation. CMAPs were recorded from a suction recording electrode placed in the same place (dotted circle) across the different animals used in this study. The phrenic nerve is shown in blue, the blood vessels in red and the area with acetylcholine receptors in grey.
