# Supplementary material for: Preserving neuromuscular synapses in ALS by stimulating MuSK with a therapeutic agonist antibody
Source: eLife journal article supplement (doi:10.7554/elife.34375), 2018-02-19
Supplement: supp [file elife-34375-supp-v1.zip]

Archive with 7 entries (7 files):
- elife_poa_e34375_Figure_3_figure_supplement_1.pdf
- elife_poa_e34375_Figure1_figure_supplement_1.pdf
- elife_poa_e34375_Transparent_Reporting_File.pdf
- elife_poa_e34375_Figure_4_figure_supplement_3.pdf
- elife_poa_e34375_Figure_5_Figure_Supplement_1.pdf
- elife_poa_e34375_Figure_4_figure_supplement_1.pdf
- elife_poa_e34375_Figure_4_figure_supplement_2.pdf
