# Supplementary material for: Preserving neuromuscular synapses in ALS by stimulating MuSK with a therapeutic agonist antibody
Source: eLife journal article supplement (doi:10.7554/elife.34375), 2018-02-19
Supplement: supp [file elife-34375-supp-v1.zip › elife_poa_e34375_Figure_3_figure_supplement_1.pdf]

**Figure 3 - Figure Supplement 1**

**A**

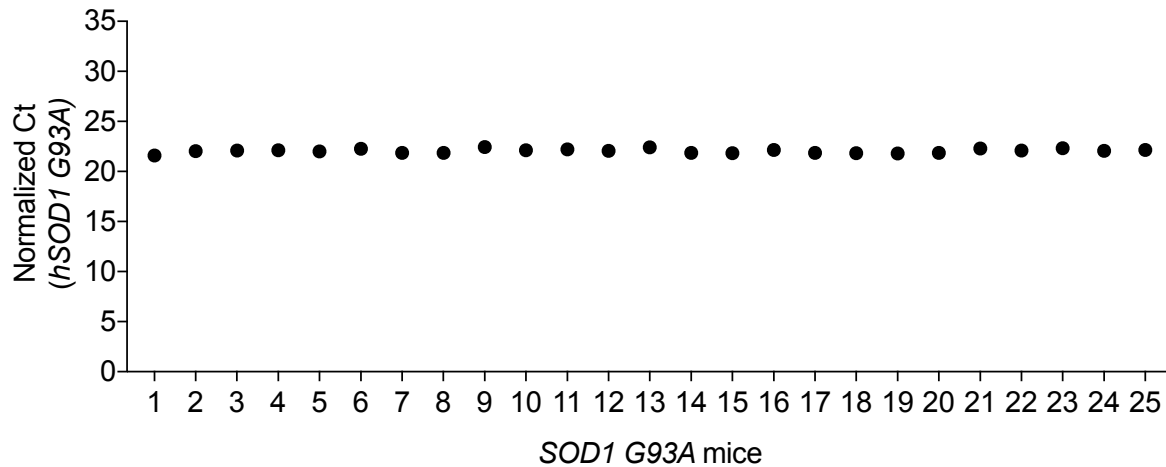

***hSOD1 G93A* copy number remained unchanged over generations and throughout the experiments.** (A) The copy number of the human *SOD1 G93A* gene was quantified by real-time PCR and normalized to *GAPDH*. All mice included in this study had 21-26 copies of *hSOD1 G93A*. The normalized *hSOD1 G93A* Ct values are shown for 25 samples (filled circles).
