# Supplementary material for: Preserving neuromuscular synapses in ALS by stimulating MuSK with a therapeutic agonist antibody
Source: eLife journal article supplement (doi:10.7554/elife.34375), 2018-02-19
Supplement: supp [file elife-34375-supp-v3.zip]

**Figure 4- Figure Supplement 3**

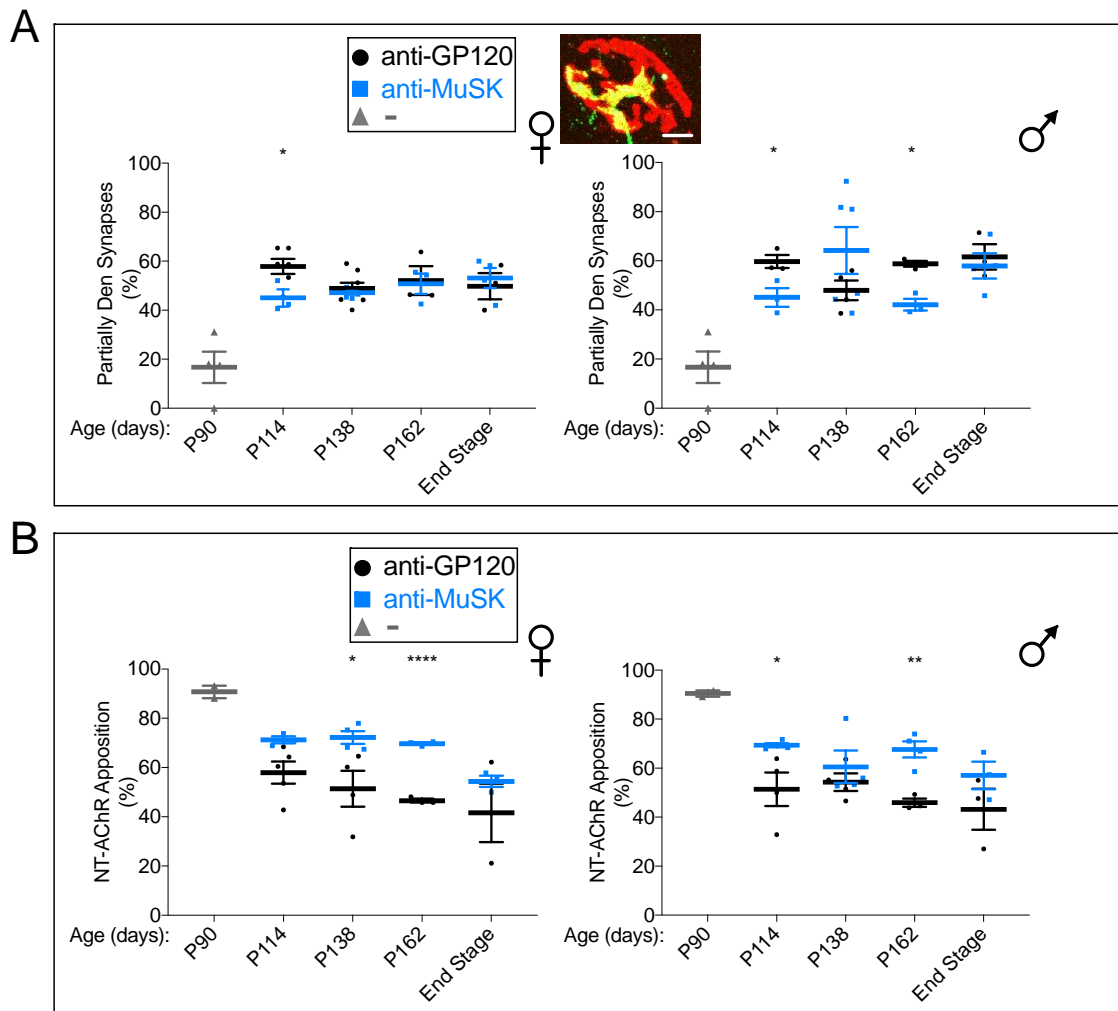

**Chronic dosing with the MuSK agonist antibody increases the extent of nerve terminal coverage at partially innervated synapses in *SOD1 G93A* mice.** (A) The number (~50%) of partially innervated synapses in *SOD1 G93A* mice is not altered by chronic injection of reverse chimera MuSK agonist antibody #13 (blue square). The inset shows a representative partially innervated synapse (scale bar=20 $\mu$ m). (B) The extent of the AChR-rich postsynaptic membrane that is apposed by nerve terminals (NT) is greater in *SOD1 G93A* mice injected with the MuSK agonist antibody (blue square) than with a control antibody to GP120 (black circle). The scatter plot shows the values for individual mice, as well as the mean values and SEM; \*  $p < 0.05$ , \*\*  $p < 0.01$ , \*\*\*\*  $p < 0.0001$ .
