# Supplementary material for: Preserving neuromuscular synapses in ALS by stimulating MuSK with a therapeutic agonist antibody
Source: eLife journal article supplement (doi:10.7554/elife.34375), 2018-02-19
Supplement: supp [file elife-34375-supp-v3.zip]

**Figure 4- Figure Supplement 2**

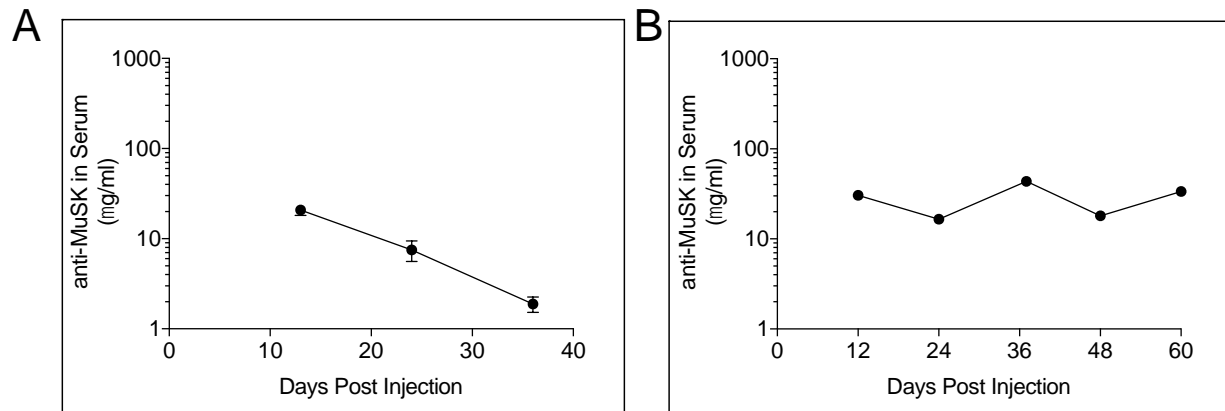

**The reverse chimera MuSK agonist antibody #13 has a half-life of 11 days and chronic dosing with this antibody maintains the agonist antibody at levels that are sufficient to saturate MuSK at the synapse.** Rc MuSK antibody #13 was produced to minimize the occurrence of an immune response to a human antibody, as well as to eliminate the danger of eliciting an immune response at the neuromuscular synapse. (A) Following a single 10mg/kg injection of reverse chimera MuSK agonist antibody #13 in wild-type mice, the amount of antibody in the blood decreased over time as a single exponential with a half-life of 11 days. (B) Repeated 10mg/kg injections of reverse chimera MuSK agonist antibody #13, every 24 days, in *SOD1 G93A* mice restored antibody levels and maintained the antibody at levels that were sufficient to saturate MuSK at the synapse. The mean values for individual mice (n=5) and the SEM are shown.
